# Supplementary material for: Insight into the esterase like activity demonstrated by an imidazole appended self-assembling hydrogelator
Source: Royal Society of Chemistry journal article supplement (doi:10.1039/c5cc04281j), 2015-01-01
Supplement: c5cc04281j1.pdf [file c5cc04281j1.pdf]

## Insight into the esterase like activity demonstrated by an imidazole appended self-assembling hydrogelator

Nishant Singh,<sup>a</sup> Maria. P. Conte,<sup>b</sup> R. V. Ulijn,<sup>b\*</sup> Juan F. Miravet<sup>a\*</sup> and Beatriu Escuder<sup>a\*</sup>

### Electronic Supplementary Information

1. Synthesis
2. Gelation experimental procedure
3. Potentiometric titration experiment
4. UV kinetics experiment
5. Circular Dichroism
6. ANS experiment
7. TEM
8. HPLC Experiment
9. FTIR
10. NMR Spectra
11. Experiments to observe retainment of **1** in aggregate state upon dilution:
  - a) Temperature dependent NMR experiment
  - b) Comparison of amount of molecules in solution for gel and diluted aliquot of gel by NMR.

## 1. SYNTHESIS.

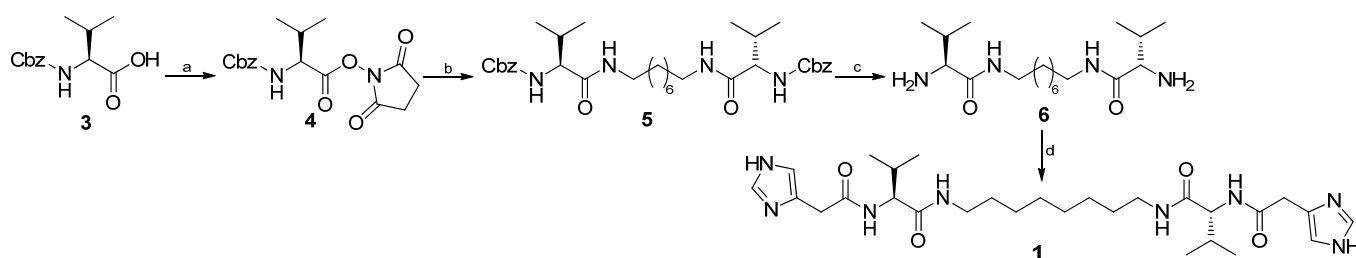

**Scheme SI\_1.** Reagents and conditions: (a) DCC, NHS, THF, 5 °C, 3 h, 91 %; (b) 1,8-diaminooctane, DME, 55 °C, 6 h, 95 %; (c) Pd/C (5% wt), H<sub>2</sub>, MeOH, 3 h, 99 %, (d) Imidazole 4-acetic acid, BOP, DIPEA, DCM, 0°C-R.T, 16 h, 70 %.

### Synthesis of compounds 1, 4, 5 and 6.

**(S)-2,5-dioxopyrrolidin-1-yl 2-(((benzyloxy)carbonyl)amino)-3-methylbutanoate (4):** A solution of commercial available Carbobenzyloxy-*L*-valine**3** (5.0 g, 19.90 mmol) and *N*-hydroxysuccinimide (2.52 g, 21.89 mmol, 1.1 eq.) in dry THF (80 mL) was added dropwise under N<sub>2</sub> at 0 °C with a dropping funnel to a solution of *N,N'*-Dicyclohexylcarbodiimide (4.52 g, 21.89 mmol, 1.1 eq.) in dry THF (25 mL). The mixture was further stirred for 1 h at 0 °C. The solution was then allowed to stand into refrigerator for 2 h, which caused precipitation of *N,N'*-Dicyclohexylurea. After this time, the mixture was filtered under vacuum, and the filtrate was removed under reduced pressure and the crude residue was purified by crystallization in isopropanol to yield **4** (6.31 g, 18.11 mmol, 91%) as a white solid. The NMR spectra were consistent with those described in the literature.<sup>1</sup>

**Dibenzyl ((2S,2'R)-(octane-1,8-diylbis(azanediyl))bis(3-methyl-1-oxobutane-2,1-diyl))dicarbamate (5):** A solution of compound **4** (6.31 g, 18.11 mmol) in DME (80 mL) was added dropwise under N<sub>2</sub> at 25 °C with a dropping funnel to a solution of commercial available 1,8-diamino octano (2.88 g, 19.92 mmol, 1.1 eq.) in DME (50 mL). The mixture was further stirred for 5 h at 50 °C. The white solid obtained was filtered under vacuum, and

<sup>1</sup> Becerril, J.; Bolte, M.; Burguete, M. I.; Galindo, F.; García-España, E.; Luis, S. V.; Miravet, J. F., *J. Am. Chem. Soc.* **2003**, 125, 6677-6686.

the residue was washed with HCl 0.1 M (100 mL) and water (200 mL). The compound was dried under reduced pressure at 50 °C to yield **5** (10.51 g, 17.21 mmol, 95%) as a white solid. The NMR spectra were consistent with those described in the literature.<sup>1</sup>

**(S)-2-amino-N-(8-((R)-2-amino-3-methylbutanamido)octyl)-3-methylbutanamide (6):**

Palladium catalyst (5% Pd/C, 526 mg) was suspended in MeOH (250 mL) and stirred under H<sub>2</sub> at room temperature for 10 min. Subsequently, a solution of compound **5**, (10.51 g, 17.21 mmol) in MeOH (100 mL) was added via syringe, followed by stirring under H<sub>2</sub> at room temperature for 3 h. The reaction mixture was then filtered through Celite, and the solvent was removed under reduced pressure. The white solid obtained was filtered under vacuum, and the residue was washed with NaOH 0.1 M (100 mL) and water (200 mL). The compound was dried under reduced pressure at 50 °C to yield **6** (5.84 g, 17.04 mmol, 99%) as a white solid. The NMR spectra are consistent with those described in the literature.<sup>1</sup>

**(2S,2'S)-N,N'-(octane-1,8-diyl)bis(2-(2-(1H-imidazol-4-yl)acetamido)-3-methylbutanamide) (1):**

Imidazole-4 acetic acid hydrochloride (95 mg, 0.6mmol.) was dissolved in dry DCM followed by addition of N,N-diisopropylethylamine (0.2mL.) and benzotriazol-1-yloxy-tris(dimethylamino)-phosphoniumhexafluorophosphate (258mg, 0.6mmol) at 0°C. To this solution was added **6** (100mg, 0.3mmol), dissolved in DCM in a dropwise manner. The reaction mixture was monitored by TLC until completion. This mixture was then sonicated and washed with 3 batches of 10 mL of 0.1M NaOH followed by washing with water and DCM over sintered funnel. The obtained solid was dried under vacuum to yield the final product in 70% yield.

**Compound 1:**

<sup>1</sup>H NMR (500 MHz, DMSO-d<sub>6</sub>): δ 8.06 (H14, t, *J* = 5.4 Hz, 2H), 7.90 (H8, d, *J* = 8.9 Hz, 2H), 7.60 (H2, s, 2H), 6.88 (H4, s, 2H), 4.10 (H9, dd, *J* = 8.9, 6.5 Hz, 2H), 3.44 (H6, d, 2H,

$J=5.8$  Hz), 3.40 (H6', d, 2H,  $J=5.8$  Hz), 3.02 (H15, m, 2H), 2.98 (H15', m, 2H), 1.95 (H10, oct., 2H,  $J=6.5$  Hz), 1.37 (H16, t, 4H,  $J=6.5$  Hz), 1.22 (H17, H18, broad singlet, 8H), 0.80 (H11, d,  $J=6.5$  Hz, 6H), 0.78 (H12, d,  $J=6.5$  Hz, 6H)

**$^{13}\text{C}$  NMR** (126 MHz, DMSO- $d_6$ ):  $\delta$  171.0, 170.3, 135.4, 135.1, 113.8, 58.1, 38.8, 35.8, 30.8, 29.4, 29.0, 26.7, 19.6, 18.2.

**HR ESMS:**  $m/z$ :  $[\text{M}+\text{H}]^+$  Calcd for  $\text{C}_{28}\text{H}_{46}\text{N}_8\text{O}_4$  : 559.3676; found: 559.3721;  $\Delta=0.2$  ppm.

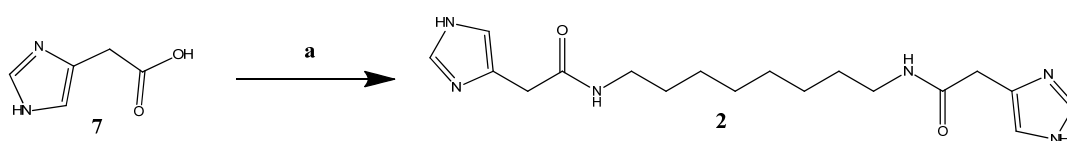

**Scheme SI\_2.** Reagents and conditions: (a) BOP, 1,8-diaminooctane, DIPEA, DCM, 0°C-R.T., 12 hr, 65%.

**N-(8-(2-(1H-imidazol-4-yl)acetamido)octyl)-2-(1H-imidazol-5-yl)acetamide (2):**

**7** (221 mg, 1.4 mmol.) was dissolved in dry DCM followed by addition of  $N,N$ -diisopropylethylamine (0.5 mL.) and Benzotriazol-1-yloxy-tris(dimethylamino)-phosphoniumhexafluorophosphate (616 mg, 1.4 mmol) at 0°C. To this solution was added a suspension of 1,8-diaminooctane (90 mg, 0.6 mmol) in DCM in a dropwise manner. The reaction mixture was monitored by TLC until completion. This mixture was then sonicated and washed with 3 batches of 10 mL of 0.1M NaOH followed by washing with water and DCM over cindered funnel. The obtained solid was dried under vacuum to yield the final product in 65% yield.

**Compound 2:**

**$^1\text{H}$  NMR** (500 MHz, DMSO- $d_6$ ):  $\delta$  11.81 (H1, broad s, 2H), 7.79 (H8, broad s, 2H), 7.49 (H2, s, 2H), 6.85 (H5, s, 2H), 3.42 (H6, 2H (with water of DMSO)), 3.02 (H9, m, 4H), 1.44 (H10, m, 4H), 1.21 (H11, H12, m, 8H).

**$^{13}\text{C}$  NMR** (126 MHz, DMSO- $d_6$ ):  $\delta$  170.9, 135.4, 135.2, 117.5, 39.4, 39.2, 34.7, 29.0, 26.4.

**HR ESMS:** m/z:  $[M+H]^+$  Calcd for  $C_{18}H_{28}N_6O_2$  : 361.2307; found: 361.2350;  $\Delta=0.6$  ppm.

## **2. Gelation Experimental procedure:**

The desired amount of compound **1** was dissolved in 0.1M TRIS-HCl buffer and sonicated to get a suspension. This suspension was then heated to dissolve the compound to get a clear solution and then was allowed to stand for 1 hour to come to room temperature forming hydrogels. The minimum gelation concentration was obtained using tube inversion method and did not vary significantly for different pH values.

## **3. Potentiometric Titration Experiments:**

**1** was dissolved in an excess of aqueous HCl(0.1M) and then titrated with aqueous NaOH (0.1M). The pH was recorded with a glass pH electrode and the data analyzed with HYPERQUAD2008 and HYSS2009 to afford acidity constants. The pKa was determined for two concentrations as reported below.

| <b>Conc.</b> | <b>pKa</b><br>(calculated error less than 5%) |
|--------------|-----------------------------------------------|
| 17.2 mM      | 6.6, 5.9                                      |
| 1.8 mM       | 6.3, 6.2                                      |

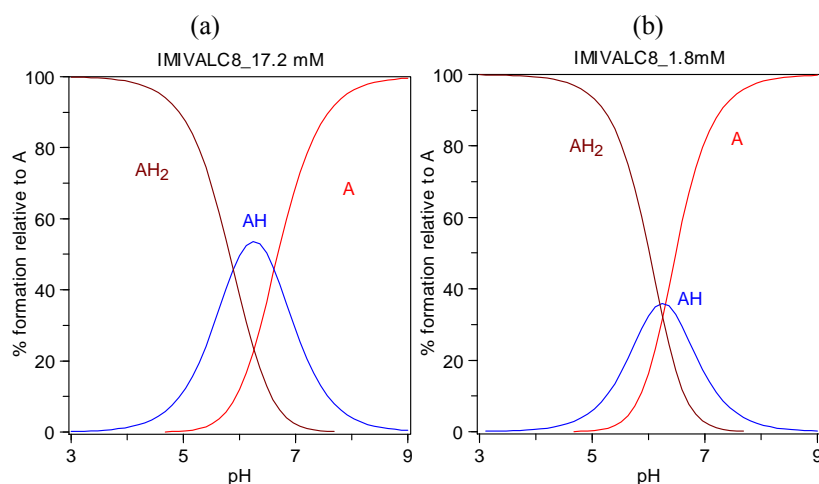

**Figure S1:** Relative abundance of different protonated and deprotonated species of **1** with respect to pH at (a) 17.2 mM (b) 1.8 mM.

#### 4. UV kinetics experiment:

Kinetics of hydrolysis was measured using a JASCO FP-8300 spectrometer by recording the absorbance at 400nm. The 800  $\mu\text{L}$  of a known concentration of catalyst was vortexed with 1mL of 0.1M TRIS-HCl buffer and 100 $\mu\text{L}$  of it was added to 1cm quartz cell containing 1.8mL of buffer. To this 100 $\mu\text{L}$  of substrate dissolved in acetonitrile was added from a freshly prepared stock solution. The final concentration of **1** under self-assembled state or **2** used for hydrolysis was  $17 \times 10^{-5}$  M. The catalysis experiments were generally done in triplicate. Similar procedure was followed for hydrolysis by non-aggregating concentrations of **1** with final concentrations of 0.09mM, 0.045mM, 0.025mM at pH 6, pH 7 and pH 8 respectively. Graph pad prism version 6.05 software was used for data fitting.

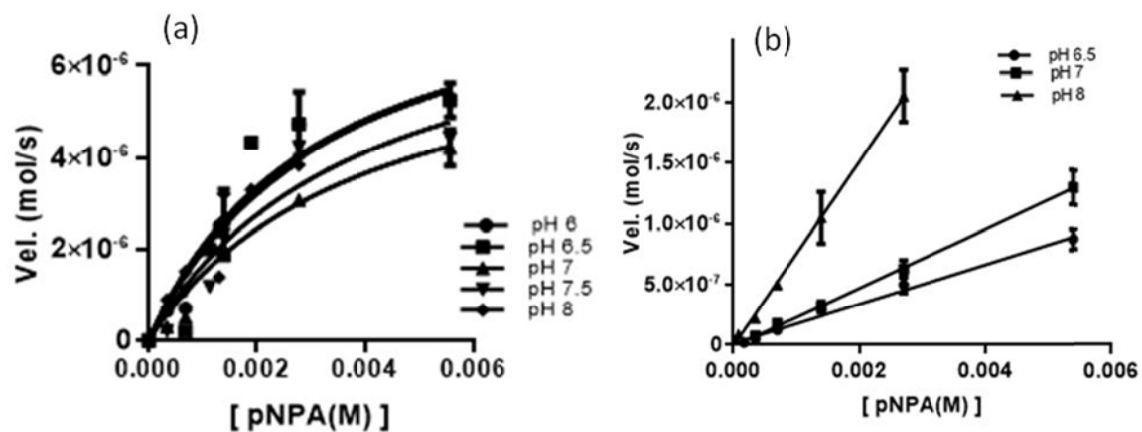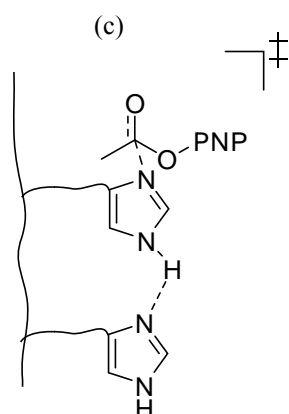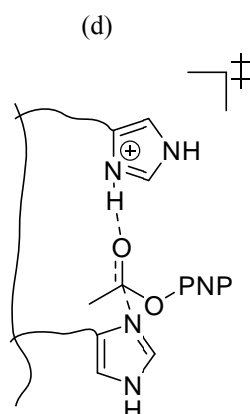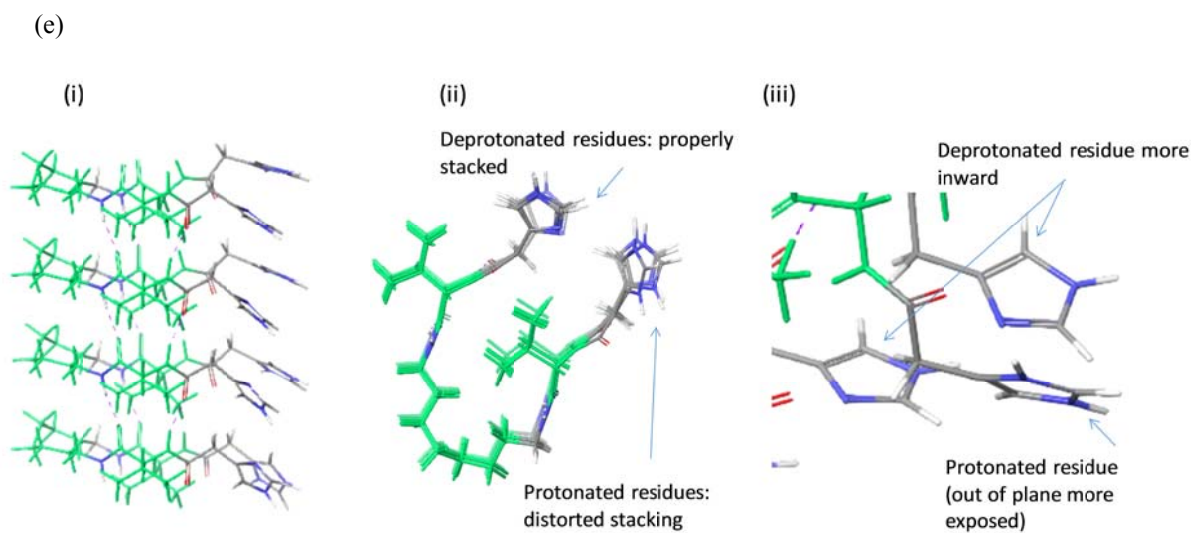

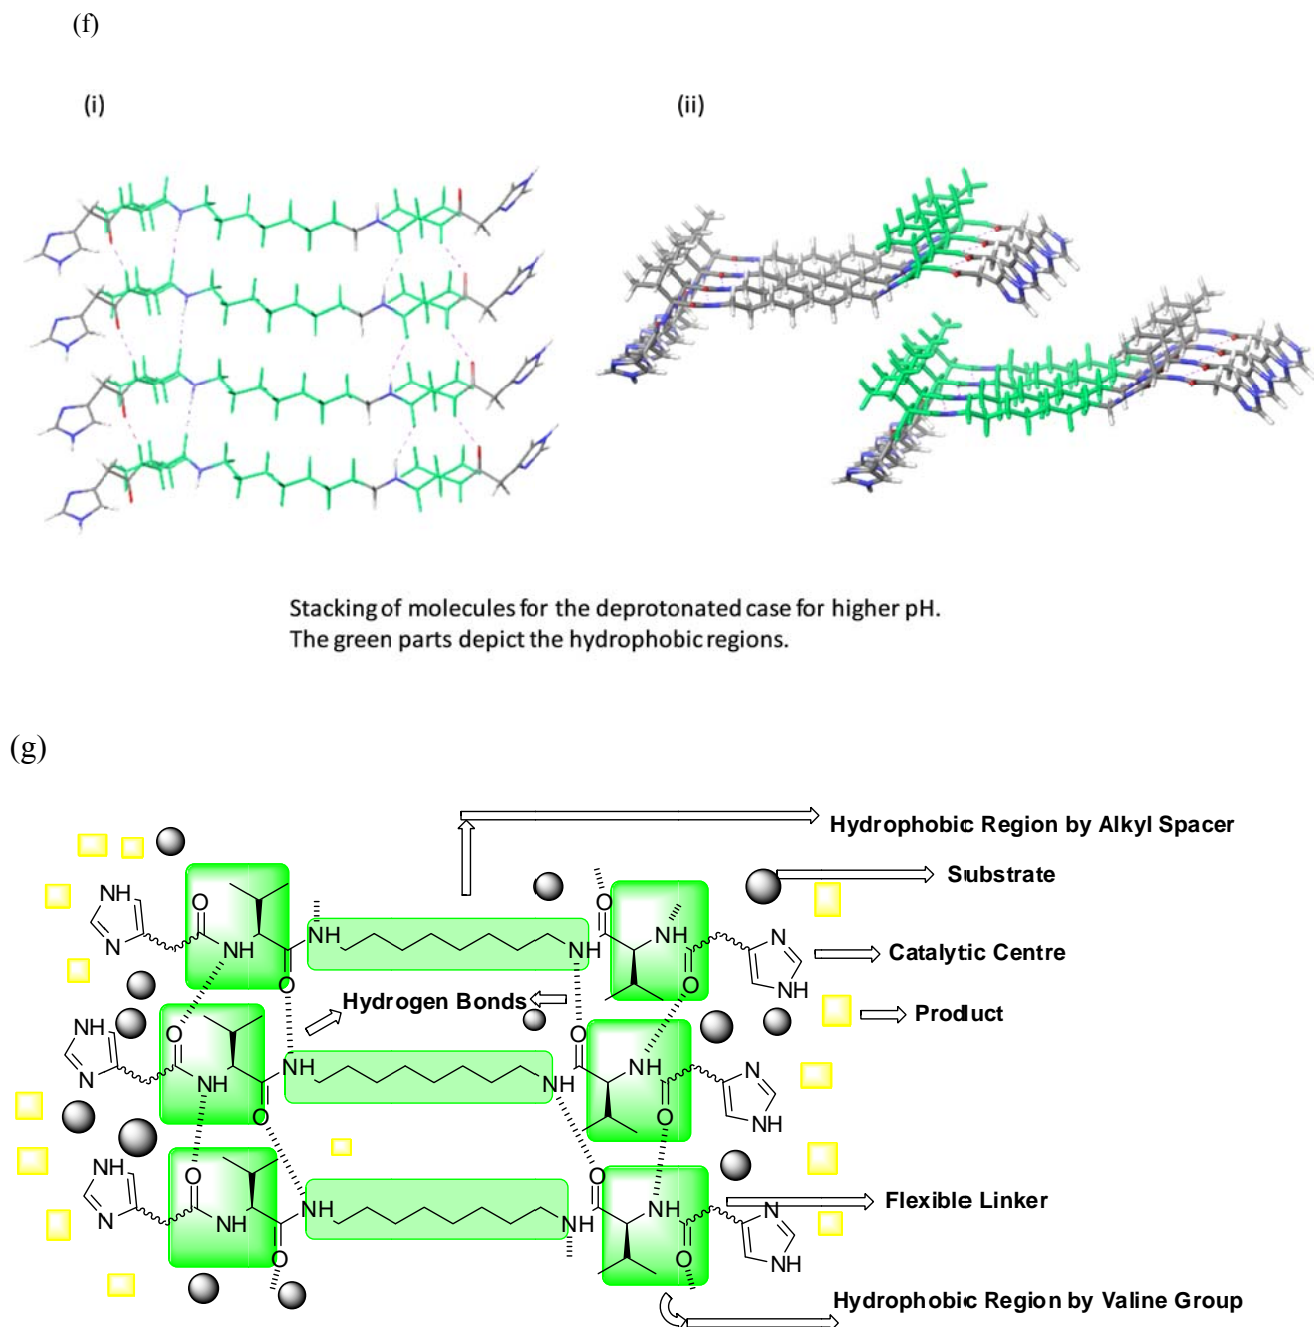

**Fig.S2:** (a) Michaelis-Menten graph for the hydrolysis of pNPA by **1** for different pH values (b) Hydrolysis of pNPA by **2** for different pH values. Schematic representation of proposed transition states for the hydrolysis of pNPA by (c) neutral imidazole residues and (d) cooperation between protonated and neutral imidazole residues. (e) (i) probable stacking of molecules in the case of lower pH values: shown here is one of the many probabilities, in this case stacking with folded molecules. Green part depicts the hydrophobic regions due to alkyl chain and valine group. For the sake of simplicity half of the imidazoles on one side of the molecules are taken as protonated. They can be present in random proportions as well (ii) the distorted stacking between the protonated residues that gives rise to the twist in fibers as seen in TEM and confirmed by CD (iii) protonated residue depicted being outward and stacked with higher slip angle making them more exposed to the solvent and substrates. (f) (i) Proper stacking of molecules at higher pH values (ii) two such stacked fibers together forming hydrophobic regions (g) General schematic of molecular stacking and availability of hydrophobic sites near imidazole residues for catalysis.



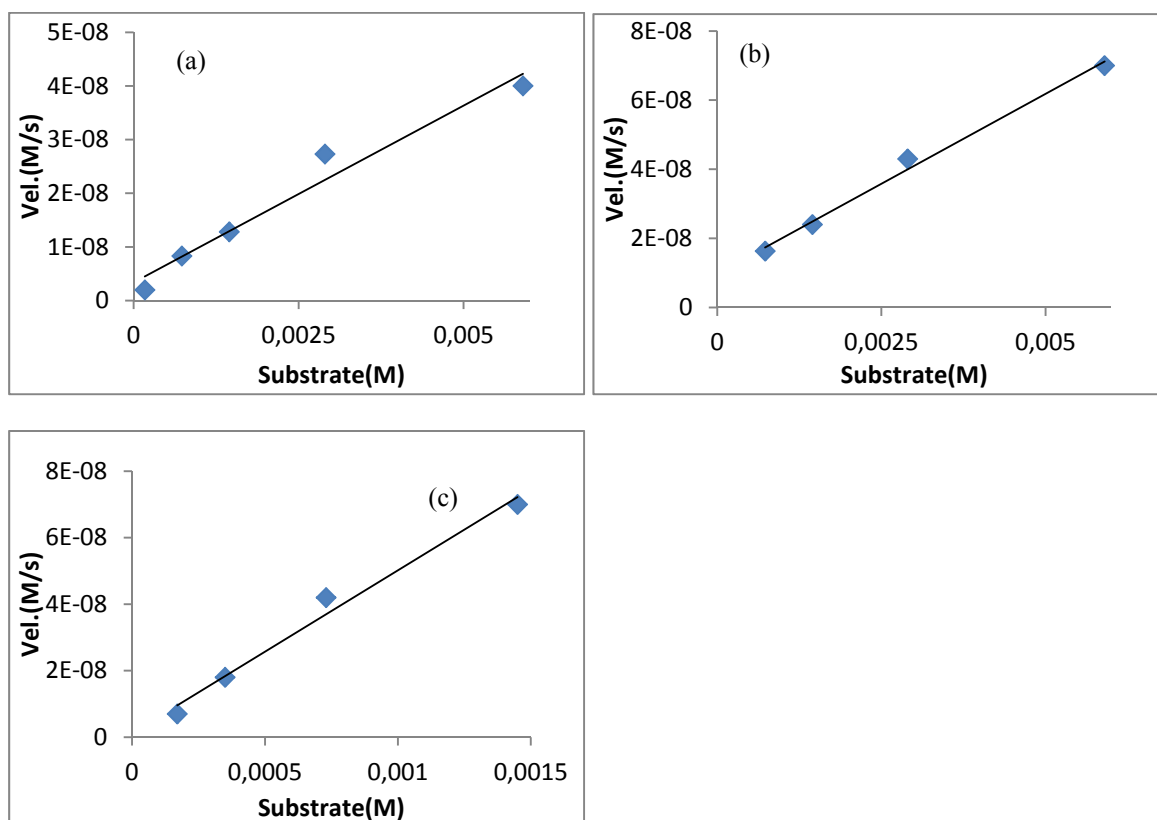

**Figure S3:** Observed hydrolysis rate by **1** under non aggregating conditions for (a) pH 6, (b) pH 7 and (c) pH 8.  $K_{\text{sec}}$  values for pH 6, pH 7 and pH 8 are  $0.07\text{M}^{-1}\text{s}^{-1}$ ,  $0.23\text{M}^{-1}\text{s}^{-1}$ ,  $1.8\text{M}^{-1}\text{s}^{-1}$  respectively.

## 5. Circular Dichroism:

CD experiments were performed using JASCO J-810 spectrometer for gels of **1** prepared directly in 1mm quartz cells. Measurements were performed at room temperature and spectra were recorded from 180 nm to 450 nm with 1.0 nm step and 1.0 nm bandwidth.

## NMR Solubility Experiment:

All the NMR experiments were performed on Varian 500MHz spectrometer. For each data point freshly prepared samples were used by pouring hot solution of compound dissolved in buffered water into NMR tubes which were then allowed to stand for 24 hours. In this tube, another concentric NMR tube containing 50mM hydroquinone dissolved in  $\text{D}_2\text{O}$  was

introduced as an internal reference. NMR spectra in water were recorded at different concentrations of **1** ranging from completely soluble to gel state. The peak of water was presaturated to obtain the spectra. The solubility constants at different pH values were obtained by plotting the relative integral of a chosen peak in the spectra against the concentration of **1** for different concentration.

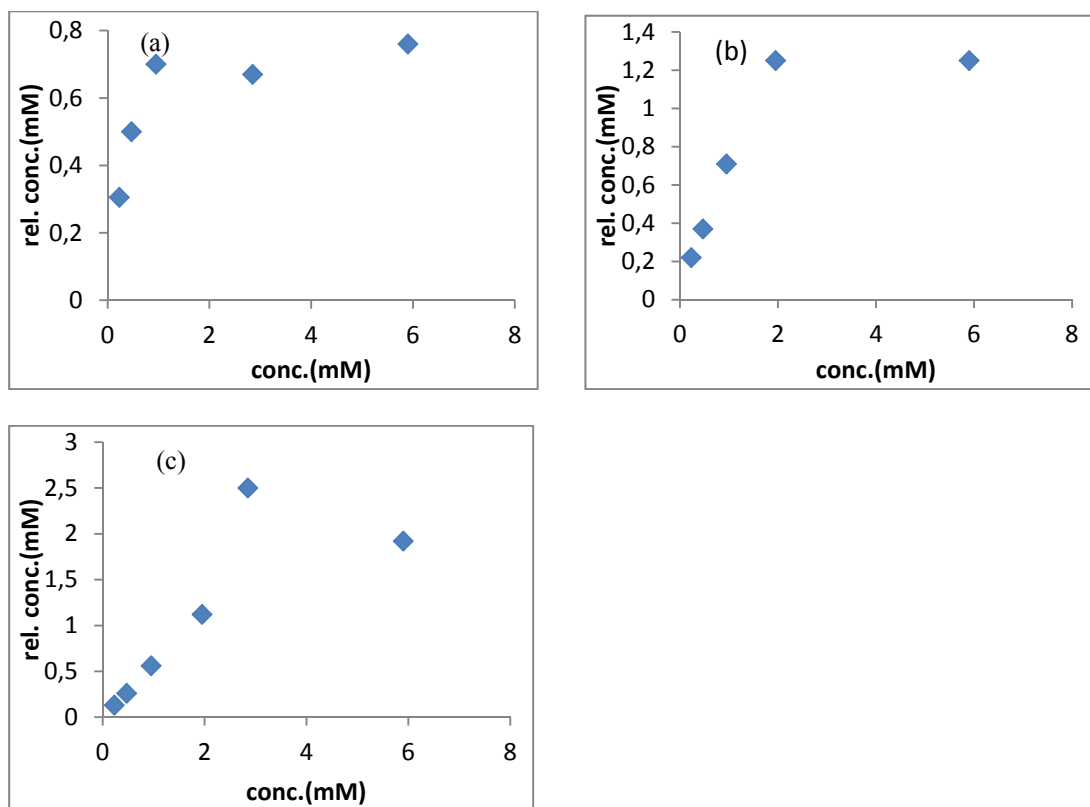

**Figure S4:** NMR solubility experiment graph for **1** at (a)pH 8, (b) pH 7 and (c) pH 6. Relative integral are w.r.t to 50mM hydroquinone in D<sub>2</sub>O which was present in a concentric tube inside the NMR tube with the sample. The integral for hydroquinone peak was always taken as 100.

## 6. ANS Experiment:

From a stock solution of concentration 0.8mM ANS in H<sub>2</sub>O, 100μL solution was introduced in the 0.8mL of the vortexed gels at different pH values. An aliquot of 15 μL from this was diluted to 215μL in the TRIS-HCl buffer of respective pH and the fluorescence spectrum was recorded.

**7. TEM:** TEM micrographs were obtained using a JEOL 2100 transmission electron microscope. The TEM samples were prepared by directly applying gels at m.g.c on carbon coated TEM grid. A 5 $\mu$ L droplet of purified water was used to remove the salts and the excess solution was wicked off using filter paper. The samples were immediately stained using 5 $\mu$ L droplet of 1% phosphotungstic acid and was allowed to stand for 5 min. The excess solution was removed using a filter paper. The grids were then left under covered petri dish to dry before obtaining images.

**8. HPLC analysis for *L* and *D*-phenylalanine methyl ester catalysis:** 400  $\mu$ L of gels and solutions of **1** and **2** respectively, were prepared in TRIS-HCl buffer at pH 7 and were allowed to stand for 24 hours. The gels were then vortexed in which 50 $\mu$ L of *L*- or *D*-phenylalanine methyl ester hydrochloride of respective concentrations prepared in the same buffer were introduced. The reaction vessels were then analysed by HPLC for a specific time by using a gradient of 5% to 95% acetonitrile(containing 1% TFA) w.r.t to water in 45 minutes.

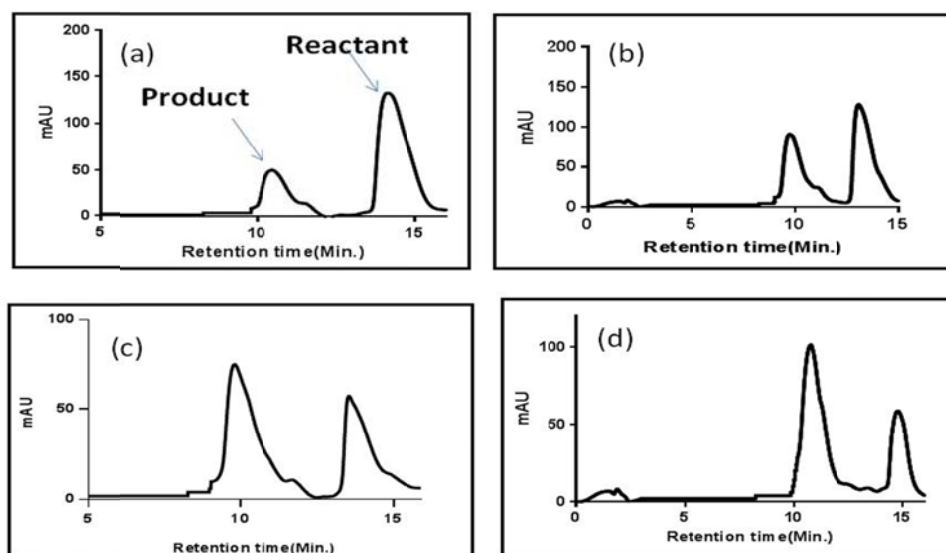

**Fig. S6:** HPLC chromatogram of the hydrolysis of phenylalanine methyl ester hydrochloride [12.3mM] using **1** [5.6mM] for (a) 8 hours (b) 30 hours (c) 60 hours (d) 72 hours.

The peak at 13.8 minutes corresponds to: phenylalanine methyl ester and the peak at 10 minutes corresponds to the product formed after hydrolysis.

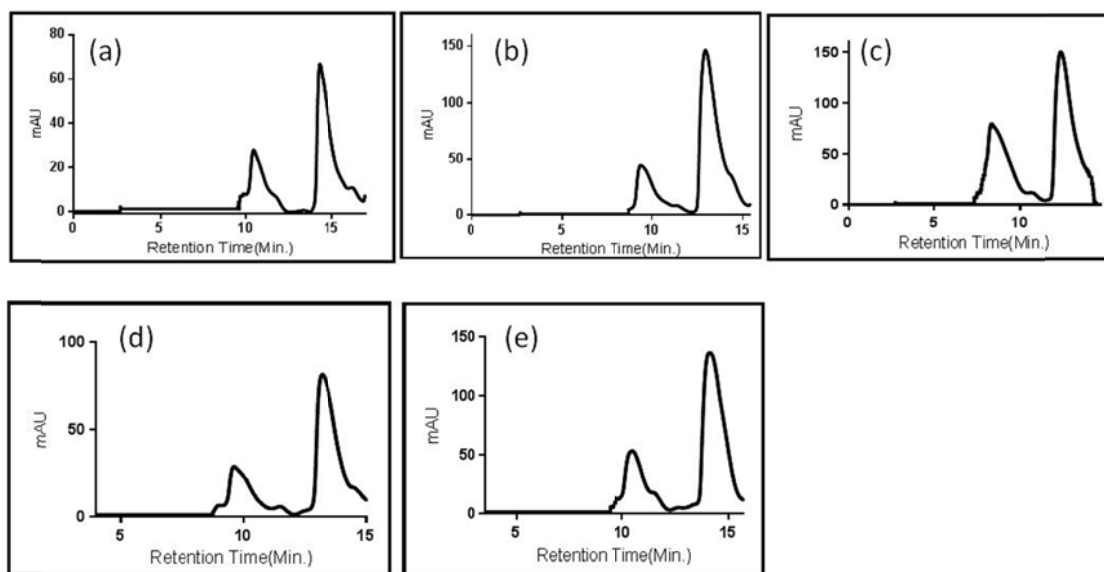

**Fig. S7:** HPLC chromatogram of the hydrolysis of different concentrations of *L*-phenylalanine methyl ester using **1** [5.7mM] for 12 hours (a) 4.2 mM (b) 8.2 mM (c) 12.3 mM (d) 16.5 mM (e) 20.7 mM.

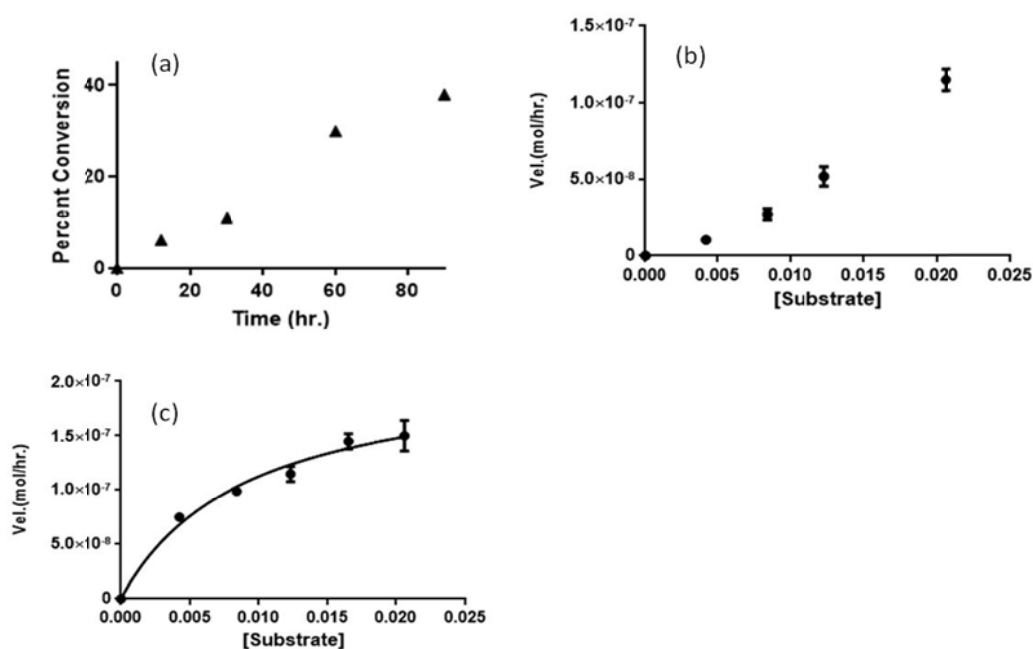

**Fig. S8:** (a) Percentage conversion by hydrolysis of 12.3Mm *L*-phenylalanine methyl ester by **2** over time. (b) Rate of hydrolysis of different concentrations of *L*-phenylalanine methyl ester using **2** [5.7mM] for 24 hours (c) Michaelis-Menten fit for the hydrolysis of *D*-phenylalanine methyl ester by **1**.

| Compound <b>1</b>                          | $k_{\text{cat}}$                               | $K_M$                     |
|--------------------------------------------|------------------------------------------------|---------------------------|
| L-phenylalanine methyl ester hydrochloride | $(3.7 \pm 0.3) \times 10^{-5} \text{ hr}^{-1}$ | $(29 \pm 1.6) \text{ mM}$ |
| D-phenylalanine methyl ester hydrochloride | $(1.5 \pm 0.1) \times 10^{-5} \text{ hr}^{-1}$ | $(9 \pm 1.5) \text{ mM}$  |

### 9. Fourier Transform Infrared Spectroscopy:

The gels at m.g.c were washed with water to remove salts and non-aggregating parts and then lyophilized. The resultant dry solid was diluted with 200-300 mg of KBr in an agate mortar and then was compressed at 10 ton c.a. 2-3 minutes to make pellets. JASCO FTIR-6200 spectrometer was used to obtain the IR spectra.

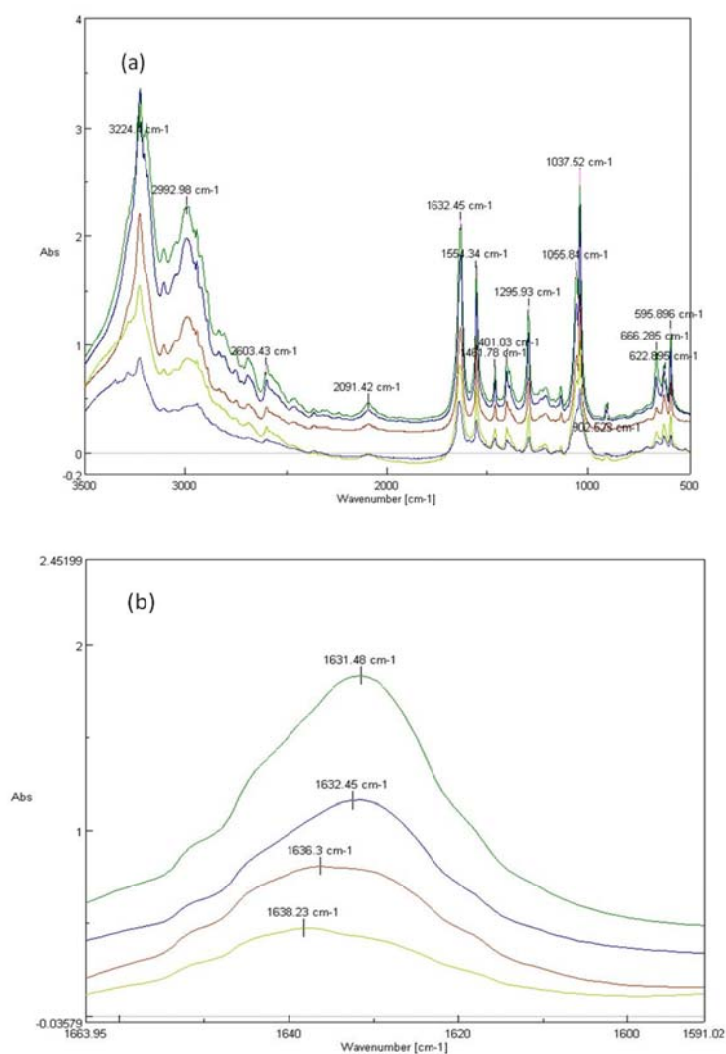

**Figure S9:** (a) IR spectra for gels of **1** at different pH values.

(b) Expanded amide I band region for  $\beta$  sheet: pH 8 (light green), pH 7.5 (red), pH 7 (blue), pH 6 (dark green).

## 10. NMR:

### Compound 1:

#### $^1\text{H}$ NMR:

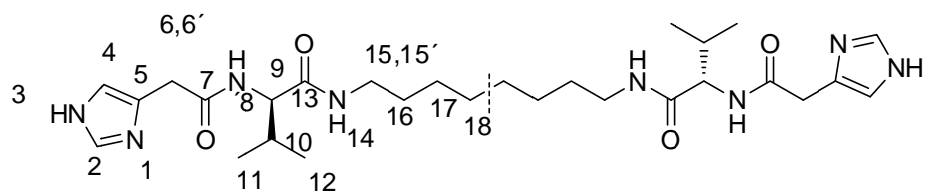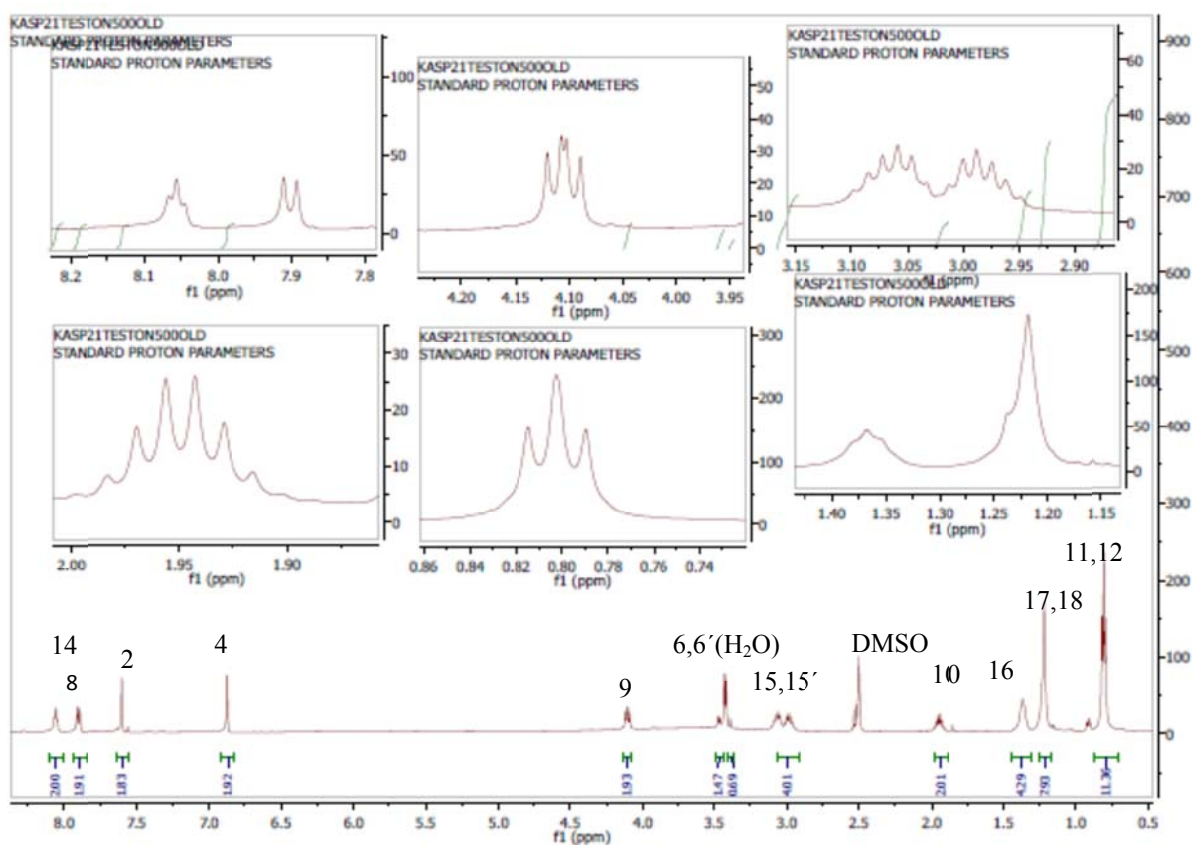

<sup>13</sup>C NMR:

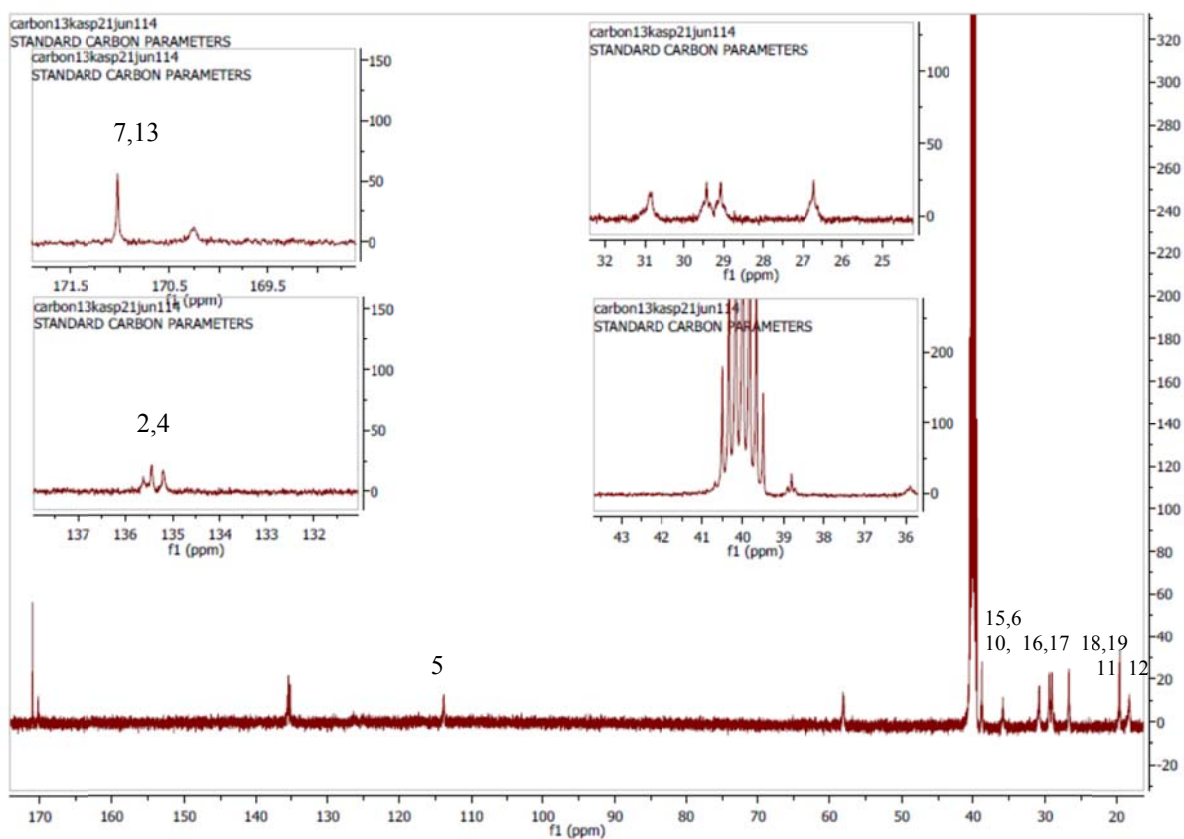

## Compound 2:

$^1\text{H}$  NMR:

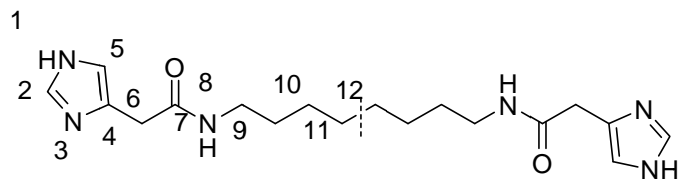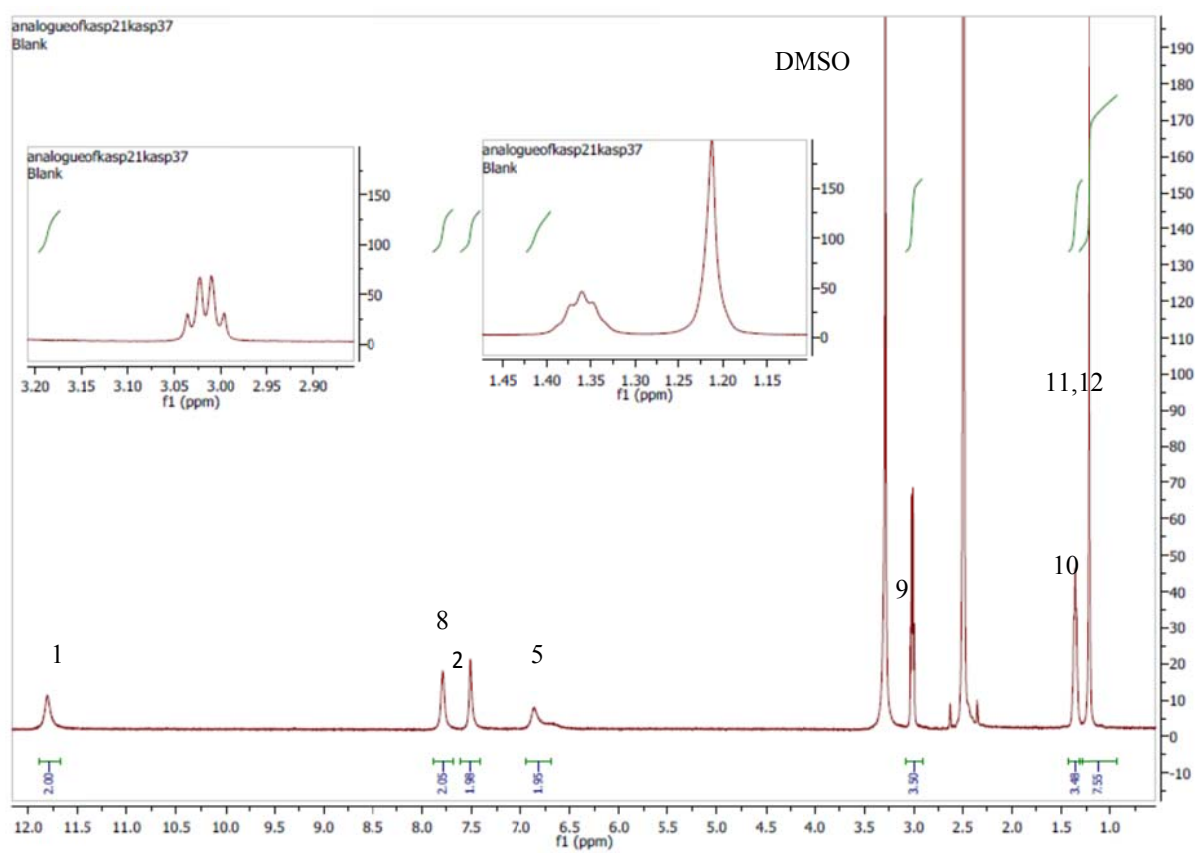



## <sup>13</sup>C NMR:

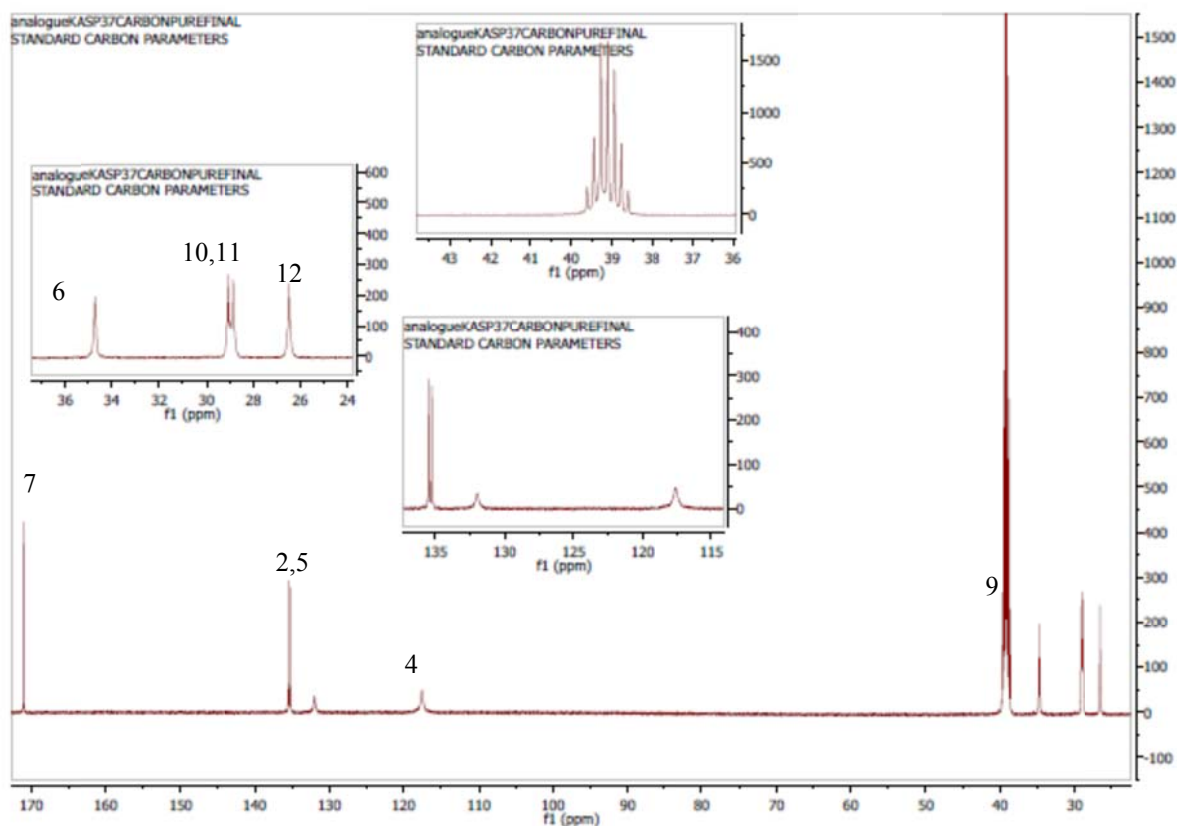

## 11.

### a. Temperature dependent NMR experiment:

To establish the retention of molecules in aggregated state upon dilution, as used for catalysis, a temperature dependent NMR experiment was performed. An aliquot from the gel of compound **1** was diluted to 0.17mM following the same method as used in catalysis. This sample was transferred to an NMR tube containing a concentric tube with an internal standard, hydroquinone(50mM). The tube was subjected to rise in temperature and respective NMR integrals were recorded. With subsequent rise in temperature the relative integral of compound **1** rose w.r.t the fixed integral of hydroquinone (set as 100). Thus it can be deduced

that the molecules which were in aggregated state (NMR invisible), on application of heat disintegrated and started getting solubilised into the solution (NMR visible).

**b.** Comparison of amount of molecules in solution for gel and diluted aliquot of gel by NMR:

A gel of **1** was prepared in an NMR tube with an internal standard of hydroquinone(50mM).

The concentration of molecules in solution was found to be 2.3 mM. Subsequently an aliquot of gel was diluted to 0.17mM and the concentration of **1** in solution was found to be 0.08mM.

The ratio of molecules in solution for gel and aliquot is 1.17 which confirms that **1** still retains most of its aggregate form upon dilution.

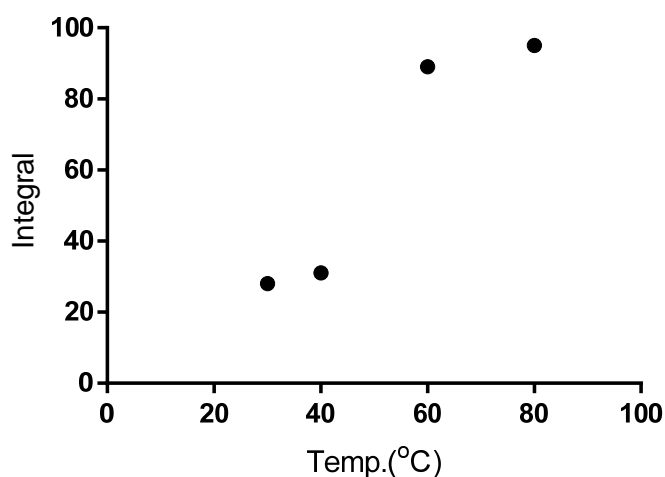

**Fig. S10:** Integral of a selected peak of compound **1** w.r.t to the fixed integral of hydroquinone versus temperature.
